# Supplementary material for: Halophytic Grasses, a New Source of Nutraceuticals? A Review on Their Secondary Metabolites and Biological Activities
Source: PubMed Central journal article supplement (PMC6429475; doi:10.3390/ijms20051067), 2019-03-01
Supplement: ijms-20-01067-s001.pdf [file ijms-20-01067-s001.pdf]

|    |                                                 |                |    |                |                |                |    |    |    |                |    |                |    |    |                |                |    |                |                |    |                                                                                                                                           |                                                                                                                                 |
|----|-------------------------------------------------|----------------|----|----------------|----------------|----------------|----|----|----|----------------|----|----------------|----|----|----------------|----------------|----|----------------|----------------|----|-------------------------------------------------------------------------------------------------------------------------------------------|---------------------------------------------------------------------------------------------------------------------------------|
| 41 | Hexadecanoic acid (Palmitic acid)               | + <sup>a</sup> | nd | + <sup>b</sup> | + <sup>c</sup> | + <sup>d</sup> | nd | nd | nd | + <sup>e</sup> | nd | nd             | nd | nd | nd             | nd             | nd | nd             | + <sup>f</sup> | nd | nd                                                                                                                                        | <sup>a</sup> [43]; <sup>b</sup> [56,57],<br><sup>c</sup> [68]; <sup>d</sup> [58,64–66];<br><sup>e</sup> [67]; <sup>f</sup> [69] |
| 42 | Hexadec-9-enoic acid (Palmitoleic acid)         | nd             | nd | nd             | nd             | nd             | nd | nd | nd | nd             | nd | nd             | nd | nd | nd             | nd             | nd | nd             | +              | nd | nd                                                                                                                                        | [69]                                                                                                                            |
| 43 | Heptadecanoic acid (Margaric acid)              | + <sup>a</sup> | nd | + <sup>b</sup> | nd             | nd             | nd | nd | nd | nd             | nd | nd             | nd | nd | nd             | nd             | nd | nd             | nd             | nd | nd                                                                                                                                        | <sup>a</sup> [43]; <sup>b</sup> [56]                                                                                            |
| 44 | Heptadecenoic acid                              | nd             | nd | nd             | nd             | nd             | nd | nd | nd | nd             | nd | nd             | nd | nd | +              | nd             | nd | nd             | nd             | nd | nd                                                                                                                                        | [59]                                                                                                                            |
| 45 | Ethyl octadecanoate                             | nd             | nd | nd             | nd             | +              | nd | nd | nd | nd             | nd | nd             | nd | nd | nd             | nd             | nd | nd             | nd             | nd | nd                                                                                                                                        | [65]                                                                                                                            |
| 46 | Octadecanoic acid (Stearic acid)                | + <sup>a</sup> | nd | + <sup>b</sup> | + <sup>c</sup> | + <sup>d</sup> | nd | nd | nd | + <sup>e</sup> | nd | nd             | nd | nd | + <sup>f</sup> | nd             | nd | + <sup>g</sup> | nd             | nd | <sup>a</sup> [43]; <sup>b</sup> [56]; <sup>c</sup> [68];<br><sup>d</sup> [64]; <sup>e</sup> [67];<br><sup>f</sup> [59]; <sup>g</sup> [69] |                                                                                                                                 |
| 47 | Ethyl octadecenoate                             | nd             | nd | nd             | nd             | +              | nd | nd | nd | nd             | nd | nd             | nd | nd | nd             | nd             | nd | nd             | nd             | nd | nd                                                                                                                                        | [65]                                                                                                                            |
| 48 | Octadecenoic acid (Oleic acid)                  | nd             | nd | + <sup>a</sup> | + <sup>b</sup> | nd             | nd | nd | nd | nd             | nd | + <sup>c</sup> | nd | nd | nd             | + <sup>d</sup> | nd | nd             | nd             | nd | nd                                                                                                                                        | <sup>a</sup> [56]; <sup>b</sup> [68];<br><sup>c</sup> [232]; <sup>d</sup> [59]                                                  |
| 49 | Ethyl Octadeca-9,12-dienoate                    | nd             | nd | nd             | nd             | +              | nd | nd | nd | nd             | nd | nd             | nd | nd | nd             | nd             | nd | nd             | nd             | nd | nd                                                                                                                                        | [65]                                                                                                                            |
| 50 | Octadeca-9,12-dienoic acid (Linoleic Acid)      | + <sup>a</sup> | nd | nd             | + <sup>b</sup> | + <sup>c</sup> | nd | nd | nd | nd             | nd | nd             | nd | nd | nd             | + <sup>d</sup> | nd | nd             | + <sup>e</sup> | nd | nd                                                                                                                                        | <sup>a</sup> [43]; <sup>b</sup> [68];<br><sup>c</sup> [65]; <sup>d</sup> [59]; <sup>e</sup> [69]                                |
| 51 | Octadeca-8,11-dienoic acid                      | nd             | nd | nd             | nd             | + <sup>a</sup> | nd | nd | nd | + <sup>b</sup> | nd | nd             | nd | nd | nd             | nd             | nd | nd             | nd             | nd | nd                                                                                                                                        | <sup>a</sup> [64]; <sup>b</sup> [67]                                                                                            |
| 52 | Octadeca-9,12,15-trienoic acid (Linolenic acid) | nd             | nd | nd             | nd             | + <sup>a</sup> | nd | nd | nd | nd             | nd | + <sup>b</sup> | nd | nd | nd             | + <sup>c</sup> | nd | nd             | + <sup>d</sup> | nd | nd                                                                                                                                        | <sup>a</sup> [64]; <sup>b</sup> [232];<br><sup>c</sup> [59]; <sup>d</sup> [69]                                                  |
| 53 | Nonadecanoic acid                               | +              | nd | nd             | nd             | nd             | nd | nd | nd | nd             | nd | nd             | nd | nd | nd             | nd             | nd | nd             | nd             | nd | nd                                                                                                                                        | [43]                                                                                                                            |
| 54 | Eicosanoic acid (Arachidic acid)                | + <sup>a</sup> | -  | + <sup>b</sup> | nd             | + <sup>c</sup> | -  | -  | -  | + <sup>d</sup> | nd | nd             | nd | nd | nd             | nd             | nd | nd             | nd             | nd | nd                                                                                                                                        | <sup>a</sup> [43]; <sup>b</sup> [56];<br><sup>c</sup> [58]; <sup>d</sup> [67]                                                   |
| 55 | Heneicosanoic acid                              | +              | nd | nd             | nd             | nd             | nd | nd | nd | nd             | nd | nd             | nd | nd | nd             | nd             | nd | nd             | nd             | nd | nd                                                                                                                                        | [43]                                                                                                                            |
| 56 | Docosanoic acid (Behenic acid)                  | + <sup>a</sup> | nd | nd             | nd             | + <sup>b</sup> | nd | nd | nd | + <sup>c</sup> | nd | nd             | nd | nd | nd             | + <sup>d</sup> | nd | nd             | nd             | nd | nd                                                                                                                                        | <sup>a</sup> [43]; <sup>b</sup> [58];<br><sup>c</sup> [67]; <sup>d</sup> [59]                                                   |



|                                       |                                    |    |                |                |    |                |    |    |                |    |                |                |    |    |                |    |                |    |    |    |                |                                                                                                                                                 |                                      |
|---------------------------------------|------------------------------------|----|----------------|----------------|----|----------------|----|----|----------------|----|----------------|----------------|----|----|----------------|----|----------------|----|----|----|----------------|-------------------------------------------------------------------------------------------------------------------------------------------------|--------------------------------------|
| 74                                    | 2,3-Dihydroxypropyl tetracosanoate | +  | nd             | nd             | nd | nd             | nd | nd | nd             | nd | nd             | nd             | nd | nd | nd             | nd | nd             | nd | nd | nd | nd             | [43]                                                                                                                                            |                                      |
| 75                                    | 2,3-Dihydroxypropyl hexacosanoate  | +  | nd             | nd             | nd | nd             | nd | nd | nd             | nd | nd             | nd             | nd | nd | nd             | nd | nd             | nd | nd | nd | nd             | nd                                                                                                                                              | [43]                                 |
| 76                                    | Dipalmitin                         | +  | nd             | nd             | nd | nd             | nd | nd | nd             | nd | nd             | nd             | nd | nd | nd             | nd | nd             | nd | nd | nd | nd             | nd                                                                                                                                              | [43]                                 |
| 77                                    | Dipalmitin, 1,3-(P2)               | +  | nd             | nd             | nd | nd             | nd | nd | nd             | nd | nd             | nd             | nd | nd | nd             | nd | nd             | nd | nd | nd | nd             | nd                                                                                                                                              | [43]                                 |
| 78                                    | Distearin                          | +  | nd             | nd             | nd | nd             | nd | nd | nd             | nd | nd             | nd             | nd | nd | nd             | nd | nd             | nd | nd | nd | nd             | nd                                                                                                                                              | [43]                                 |
| 79                                    | Palmitoylstearin                   | +  | nd             | nd             | nd | nd             | nd | nd | nd             | nd | nd             | nd             | nd | nd | nd             | nd | nd             | nd | nd | nd | nd             | nd                                                                                                                                              | [43]                                 |
| <b>Cinnamic acids and derivatives</b> |                                    |    |                |                |    |                |    |    |                |    |                |                |    |    |                |    |                |    |    |    |                |                                                                                                                                                 |                                      |
| 80                                    | Caffeic acid                       | nd | nd             | nd             | nd | <sup>+</sup> a | nd | nd | nd             | nd | <sup>+</sup> b | <sup>+</sup> c | nd | nd | nd             | nd | nd             | nd | nd | nd | <sup>+</sup> d | <sup>a</sup> [82]; <sup>b</sup> [86]; <sup>c</sup> [85]; <sup>d</sup> [92]                                                                      |                                      |
| 81                                    | Cinnamic acid                      | nd | nd             | nd             | nd | <sup>+</sup> a | nd | nd | nd             | nd | <sup>+</sup> b | nd             | nd | nd | nd             | nd | nd             | nd | nd | nd | <sup>+</sup> c | <sup>a</sup> [64,83]; <sup>b</sup> [85]; <sup>c</sup> [92]                                                                                      |                                      |
| 82                                    | <i>p</i> -Coumaric acid            | nd | <sup>+</sup> a | nd             | nd | <sup>+</sup> b | nd | nd | <sup>+</sup> c | nd | <sup>+</sup> d | <sup>+</sup> e | nd | nd | nd             | nd | <sup>+</sup> f | nd | nd | nd | <sup>+</sup> g | <sup>a</sup> [89]; <sup>b</sup> [58,82,83]; <sup>c</sup> [90]; <sup>d</sup> [87]; <sup>e</sup> [84,85]; <sup>f</sup> [91]; <sup>g</sup> [55,92] |                                      |
| 83                                    | 1- <i>O-p</i> -coumaroylglycerol   | nd | nd             | nd             | nd | nd             | nd | nd | nd             | nd | +              | nd             | nd | nd | nd             | nd | nd             | nd | nd | nd | nd             | nd                                                                                                                                              | [88]                                 |
| 84                                    | Ferulic acid                       | nd | <sup>+</sup> a | nd             | nd | <sup>+</sup> b | nd | nd | <sup>+</sup> c | nd | <sup>+</sup> d | <sup>+</sup> e | nd | nd | nd             | nd | nd             | nd | nd | nd | <sup>+</sup> f | <sup>a</sup> [89]; <sup>b</sup> [58,234]; <sup>c</sup> [90]; <sup>d</sup> [87]; <sup>e</sup> [84]; <sup>f</sup> [55,92]                         |                                      |
| 85                                    | Sinapic acid                       | nd | nd             | nd             | nd | nd             | nd | nd | nd             | nd | nd             | nd             | nd | nd | nd             | nd | nd             | nd | nd | nd | nd             | +                                                                                                                                               | [55,92]                              |
| <b>Benzoic acids and Derivatives</b>  |                                    |    |                |                |    |                |    |    |                |    |                |                |    |    |                |    |                |    |    |    |                |                                                                                                                                                 |                                      |
| 86                                    | Benzoic acid                       | nd | nd             | nd             | nd | +              | nd | nd | nd             | nd | nd             | nd             | nd | nd | nd             | nd | nd             | nd | nd | nd | nd             | nd                                                                                                                                              | [64]                                 |
| 87                                    | 1,2-Benzenedicarboxylic acid       | nd | nd             | <sup>+</sup> a | nd | nd             | nd | nd | nd             | nd | nd             | nd             | nd | nd | <sup>+</sup> b | nd | nd             | nd | nd | nd | nd             | nd                                                                                                                                              | <sup>a</sup> [56]; <sup>b</sup> [59] |
| 88                                    | Gallic acid                        | nd | nd             | nd             | nd | <sup>+</sup> a | nd | nd | nd             | nd | nd             | nd             | nd | nd | nd             | nd | nd             | nd | nd | nd | <sup>+</sup> b | <sup>a</sup> [82]; <sup>b</sup> [92]                                                                                                            |                                      |
| 89                                    | Gentisic acid                      | nd | +              | nd             | nd | nd             | nd | nd | nd             | nd | nd             | nd             | nd | nd | nd             | nd | nd             | nd | nd | nd | nd             | nd                                                                                                                                              | [89]                                 |
| 90                                    | <i>p</i> -Hydroxybenzoic acid      | nd | <sup>+</sup> a | nd             | nd | <sup>+</sup> b | nd | nd | nd             | nd | <sup>+</sup> c | <sup>+</sup> d | nd | nd | nd             | nd | nd             | nd | nd | nd | nd             | <sup>+</sup> e                                                                                                                                  | <sup>a</sup> [89];                   |

|                                                           |                                  |                |                |    |    |                |    |                |    |    |                |                |    |    |                |                |    |                |    |                |    |                |                                                                                                         |
|-----------------------------------------------------------|----------------------------------|----------------|----------------|----|----|----------------|----|----------------|----|----|----------------|----------------|----|----|----------------|----------------|----|----------------|----|----------------|----|----------------|---------------------------------------------------------------------------------------------------------|
|                                                           |                                  |                |                |    |    |                |    |                |    |    |                |                |    |    |                |                |    |                |    |                |    |                | b[58,82,234];<br>c[88];<br>d[84]; e[92]                                                                 |
| 91                                                        | Homoveratric acid                | nd             | +              | nd | nd | nd             | nd | nd             | nd | nd | nd             | nd             | nd | nd | nd             | nd             | nd | nd             | nd | nd             | nd | nd             | [89]                                                                                                    |
| 92                                                        | Syringic acid                    | nd             | nd             | nd | nd | + <sup>a</sup> | nd | nd             | nd | nd | nd             | + <sup>b</sup> | nd | nd | nd             | nd             | nd | nd             | nd | nd             | nd | + <sup>c</sup> | <sup>a</sup> [58,64,82];<br><sup>b</sup> [84]; <sup>c</sup> [92]                                        |
| 93                                                        | Vanillic acid                    | nd             | + <sup>a</sup> | nd | nd | + <sup>b</sup> | nd | nd             | nd | nd | + <sup>c</sup> | + <sup>d</sup> | nd | nd | nd             | nd             | nd | nd             | nd | nd             | nd | + <sup>e</sup> | <sup>a</sup> [89]; <sup>b</sup> [58,64,234];<br><sup>c</sup> [88]; <sup>d</sup> [84]; <sup>e</sup> [92] |
| 94                                                        | Protocatechuic acid              | nd             | nd             | nd | nd | nd             | nd | nd             | nd | nd | nd             | nd             | nd | nd | nd             | nd             | nd | nd             | nd | nd             | nd | +              | [92]                                                                                                    |
| <b>Other Short Chain Carboxylic Acids and Derivatives</b> |                                  |                |                |    |    |                |    |                |    |    |                |                |    |    |                |                |    |                |    |                |    |                |                                                                                                         |
| 95                                                        | Ascorbic acid                    | nd             | nd             | nd | nd | + <sup>a</sup> | nd | + <sup>b</sup> | nd | nd | nd             | nd             | nd | nd | nd             | nd             | nd | nd             | nd | nd             | nd | nd             | <sup>a</sup> [82]; <sup>b</sup> [110]                                                                   |
| 96                                                        | Citric acid                      | nd             | nd             | nd | nd | nd             | nd | +              | nd | nd | nd             | nd             | nd | nd | nd             | nd             | nd | nd             | nd | nd             | nd | nd             | [110]                                                                                                   |
|                                                           | Chlorogenic acid                 | nd             | nd             | nd | nd | nd             | nd | nd             | nd | nd | nd             | nd             | nd | nd | nd             | nd             | nd | nd             | nd | nd             | nd | +              | [92]                                                                                                    |
| 97                                                        | Dihydroxybutyric acid            | nd             | nd             | nd | nd | nd             | nd | nd             | nd | nd | +              | nd             | nd | nd | nd             | nd             | nd | nd             | nd | nd             | nd | nd             | [88]                                                                                                    |
| 98                                                        | Lactic acid                      | nd             | nd             | nd | nd | nd             | nd | +              | nd | nd | nd             | nd             | nd | nd | nd             | nd             | nd | nd             | nd | nd             | nd | nd             | [110]                                                                                                   |
| 99                                                        | Propanoic acid                   | nd             | nd             | nd | nd | + <sup>a</sup> | nd | nd             | nd | nd | nd             | nd             | nd | nd | nd             | + <sup>b</sup> | nd | nd             | nd | nd             | nd | nd             | <sup>a</sup> [64]; <sup>b</sup> [59]                                                                    |
| 100                                                       | Propanedioic acid (Malonic acid) | nd             | nd             | nd | nd | +              | nd | nd             | nd | nd | nd             | nd             | nd | nd | nd             | nd             | nd | nd             | nd | nd             | nd | nd             | [64]                                                                                                    |
| 101                                                       | Succinic acid                    | nd             | nd             | nd | nd | nd             | nd | +              | nd | nd | nd             | nd             | nd | nd | nd             | nd             | nd | nd             | nd | nd             | nd | nd             | [110]                                                                                                   |
| <b>Carbohydrates</b>                                      |                                  |                |                |    |    |                |    |                |    |    |                |                |    |    |                |                |    |                |    |                |    |                |                                                                                                         |
| 102                                                       | Arabinose                        | + <sup>a</sup> | nd             | nd | nd | nd             | nd | nd             | nd | nd | + <sup>b</sup> | nd             | nd | nd | nd             | nd             | nd | nd             | nd | nd             | nd | nd             | <sup>a</sup> [43]; <sup>b</sup> [107]                                                                   |
| 103                                                       | Xylose                           | + <sup>a</sup> | nd             | nd | nd | nd             | nd | nd             | nd | nd | + <sup>b</sup> | nd             | nd | nd | nd             | nd             | nd | nd             | nd | nd             | nd | nd             | <sup>a</sup> [235]; <sup>b</sup> [107]                                                                  |
| 104                                                       | Fructose                         | + <sup>a</sup> | nd             | nd | nd | nd             | nd | nd             | nd | nd | nd             | nd             | nd | nd | + <sup>b</sup> | nd             | nd | + <sup>c</sup> | nd | + <sup>d</sup> | nd | nd             | <sup>a</sup> [106]; <sup>b, c</sup> [109];<br><sup>d</sup> [108]                                        |
| 105                                                       | Galactose                        | + <sup>a</sup> | nd             | nd | nd | nd             | nd | nd             | nd | nd | + <sup>b</sup> | nd             | nd | nd | nd             | nd             | nd | nd             | nd | nd             | nd | nd             | <sup>a</sup> [106]; <sup>b</sup> [107]                                                                  |
| 106                                                       | Glucose                          | + <sup>a</sup> | nd             | nd | nd | nd             | nd | nd             | nd | nd | + <sup>b</sup> | nd             | nd | nd | + <sup>c</sup> | nd             | nd | + <sup>d</sup> | nd | + <sup>e</sup> | nd | nd             | <sup>a</sup> [106]; <sup>b</sup> [107];<br><sup>c, d</sup> [109]; <sup>e</sup> [108]                    |
| 107                                                       | Mannose                          | + <sup>a</sup> | nd             | nd | nd | + <sup>b</sup> | nd | nd             | nd | nd | + <sup>c</sup> | nd             | nd | nd | nd             | + <sup>d</sup> | nd | nd             | nd | nd             | nd | nd             | <sup>a</sup> [43]; <sup>b</sup> [64];<br><sup>c</sup> [107]; <sup>d</sup> [59]                          |
| 108                                                       | Rhamnose                         | + <sup>a</sup> | nd             | nd | nd | nd             | nd | nd             | nd | nd | + <sup>b</sup> | nd             | nd | nd | nd             | nd             | nd | nd             | nd | nd             | nd | nd             | <sup>a</sup> [43]; <sup>b</sup> [107]                                                                   |
| 109                                                       | Sucrose                          | + <sup>a</sup> | nd             | nd | nd | nd             | nd | + <sup>b</sup> | nd | nd | nd             | nd             | nd | nd | + <sup>c</sup> | nd             | nd | + <sup>d</sup> | nd | + <sup>e</sup> | nd | nd             | <sup>a</sup> [106]; <sup>b</sup> [110]                                                                  |













|     |                                                              |        |    |    |    |                |                |                |    |                |    |    |    |                |    |    |                |                |    |    |    |                |                                                                                                                           |
|-----|--------------------------------------------------------------|--------|----|----|----|----------------|----------------|----------------|----|----------------|----|----|----|----------------|----|----|----------------|----------------|----|----|----|----------------|---------------------------------------------------------------------------------------------------------------------------|
| 235 | Naringin                                                     |        | nd | nd | nd | nd             | +              | nd             | nd | nd             | nd | nd | nd | nd             | nd | nd | nd             | nd             | nd | nd | nd | nd             | [82]                                                                                                                      |
| 236 | Orientin<br>xyloside                                         | 2''-O- | nd | nd | nd | nd             | + <sup>a</sup> | nd             | nd | nd             | nd | nd | nd | nd             | nd | nd | nd             | + <sup>b</sup> | nd | nd | nd | nd             | <sup>a</sup> [58]; <sup>b</sup> [91]                                                                                      |
| 237 | Procyanidin                                                  |        | nd | nd | nd | nd             | +              | nd             | nd | nd             | nd | nd | nd | nd             | nd | nd | nd             | nd             | nd | nd | nd | nd             | [237]                                                                                                                     |
| 238 | Quercetin                                                    |        | nd | nd | nd | nd             | + <sup>a</sup> | + <sup>b</sup> | nd | + <sup>c</sup> | nd | nd | nd | + <sup>d</sup> | nd | nd | + <sup>e</sup> | nd             | nd | nd | nd | + <sup>f</sup> | <sup>a</sup> [241]; <sup>b</sup> [53];<br><sup>c</sup> [90]; <sup>d</sup> [243];<br><sup>e</sup> [195]; <sup>f</sup> [92] |
| 239 | Quercetin-3-O-<br>glucoside                                  |        | nd | nd | nd | nd             | nd             | + <sup>a</sup> | nd | + <sup>b</sup> | nd | nd | nd | nd             | nd | nd | nd             | nd             | nd | nd | nd | nd             | <sup>a</sup> [53]; <sup>b</sup> [90]                                                                                      |
| 240 | Quercetin-7-O-<br>glucoside                                  |        | nd | nd | nd | nd             | nd             | +              | nd | nd             | nd | nd | nd | nd             | nd | nd | nd             | nd             | nd | nd | nd | nd             | [53]                                                                                                                      |
| 241 | Rutin                                                        |        | nd | nd | nd | + <sup>a</sup> | + <sup>b</sup> | nd             | nd | nd             | nd | nd | nd | + <sup>c</sup> | nd | nd | nd             | nd             | nd | nd | nd | + <sup>d</sup> | <sup>a</sup> [68]; <sup>b</sup> [82,241];<br><sup>c</sup> [243]; <sup>d</sup> [92]                                        |
| 242 | Tricin                                                       |        | nd | nd | nd | nd             | nd             | + <sup>a</sup> | nd | + <sup>b</sup> | nd | nd | nd | nd             | nd | nd | nd             | nd             | nd | nd | nd | nd             | <sup>a</sup> [53]; <sup>b</sup> [90]                                                                                      |
| 243 | Tricin-7-glucoside                                           |        | nd | nd | nd | nd             | nd             | + <sup>a</sup> | nd | nd             | nd | nd | nd | nd             | nd | nd | nd             | + <sup>b</sup> | nd | nd | nd | nd             | <sup>a</sup> [53]; <sup>b</sup> [91]                                                                                      |
| 244 | 3,3',4',5'-<br>tetrahydroxy-6,8-<br>dimethoxy flavone        |        | nd | nd | nd | nd             | nd             | nd             | nd | nd             | nd | nd | nd | nd             | nd | +  | nd             | nd             | nd | nd | nd | nd             | [195]                                                                                                                     |
| 245 | 5,7-dihydroxy-<br>3',4',5'-trimethoxy<br>flavone             |        | nd | nd | nd | nd             | nd             | nd             | nd | +              | nd | nd | nd | nd             | nd | nd | nd             | nd             | nd | nd | nd | nd             | [90]                                                                                                                      |
| 246 | 4,5,7-<br>Trihydroxyisoflavone                               |        | nd | nd | nd | nd             | +              | nd             | nd | nd             | nd | nd | nd | nd             | nd | nd | nd             | nd             | nd | nd | nd | nd             | [237]                                                                                                                     |
| 247 | Dihydroxy-4'-<br>methoxy-7-<br>oxyglucopyronoside<br>flavone |        | nd | nd | nd | nd             | nd             | nd             | nd | nd             | nd | nd | nd | nd             | nd | +  | nd             | nd             | nd | nd | nd | nd             | [195]                                                                                                                     |
| 248 | Vitexin-2''-O-<br>xyloside                                   |        | nd | nd | nd | nd             | + <sup>a</sup> | nd             | nd | nd             | nd | nd | nd | nd             | nd | nd | nd             | + <sup>b</sup> | nd | nd | nd | nd             | <sup>a</sup> [58]; <sup>b</sup> [91]                                                                                      |
| 249 | Vitexin-2''-O-<br>glucoside                                  |        | nd | nd | nd | nd             | nd             | nd             | nd | nd             | nd | nd | nd | nd             | nd | nd | nd             | +              | nd | nd | nd | nd             | [91]                                                                                                                      |

---

**Other polyphenols**

---
